# Supplementary material
Source: Elsevier journal article supplement (https://www.sciencedirect.com/science/article/pii/S1413867020300295)
Supplement: mmc1 [file S1413867020300295:mmc1.docx]

**Supplementary Material**

**COVID-19: a meta-analysis of diagnostic test accuracy of commercial assays registered in Brazil**

Rodolfo Castro1,2, Paula M Luz3, Mayumi Duarte Wakimoto3, Valdilea G Veloso3, Beatriz Grinsztejn3, Hugo Perazzo3

**Institutions:**

1 Fundação Oswaldo Cruz, FIOCRUZ, Escola Nacional de Saúde Pública (ENSP), Rio de Janeiro, Brazil

2 Universidade Federal do Estado do Rio de Janeiro, UNIRIO, Instituto de Saúde Coletiva, ISC, Rio de Janeiro, Brazil

3 Fundação Oswaldo Cruz, FIOCRUZ, Instituto Nacional de Infectologia Evandro Chagas (INI), Rio de Janeiro, Brazil

|  | **Pages** |
| --- | --- |
| **Supplementary Table 1.** Description of supplementary characteristics of COVID-19 tests registered at the Brazilian Health Regulatory Agency (ANVISA) up to March 30th 2020 | **1&2** |

**Supplementary Table 1.** Description of supplementary characteristics of COVID-19 tests registered at the Brazilian Health Regulatory Agency (ANVISA) up to March 30,2020

| **Test** | **Comm,ercial enterprise** | **Not included material in the kit** | **Time of sample collection after onset of symptoms** | **Imported** | **Manufacturer** |
| --- | --- | --- | --- | --- | --- |
| CORONAVÍRUS IgG/IgM (COVID-19) | EBRAM PRODUTOS LABORATORIAIS LTDA; CNPJ: 50.657.402/0001-31 | cronometer; sample collection containers; lancets (only for full fingertip blood only); capillary tubes; centrifuge (plasma only) | NR | NR | NR |
| ECO F COVID-19 Ag | Eco Diagnostica Ltda; CNPJ: 14.633.154/0002-06 | cronometer; ECO Reader F Analyzer | NR | No | ECO Diagnóstica LTDA, Corinto, MG, Brazil |
| COVID-19 IgG/IgM ECO Teste | Eco Diagnostica Ltda ; CNPJ: 14.633.154/0002-06 | cronometer; container for sample collection; centrifuge. | NR | No | ECO Diagnóstica LTDA, Corinto, MG, Brazil |
| COVID-19 Ag ECO Teste | Eco Diagnostica Ltda; CNPJ: 14.633.154/0002-06 | cronometer; micropipettes and tips; sterile swabs | NR | No | ECO Diagnóstica LTDA, Corinto, MG, Brazil |
| Anti COVID-19 IgG/IgM Rapid Test | LABTEST DIAGNOSTICA S/A; CNPJ: 16.516.296/0001-38 | cronometer | IgM antibody after 3 to 6 days and IgG after 8 days | NR | NR |
| LUMIRATEK COVID-19 (IgG/IgM) | LUMIRADX HEALTHCARE LTDA - CNPJ: 22.940.751/0001-20 | Sample collection containers; centrifuge (plasma only); micropipette; cronometer; lancets (for whole blood only) | IgM antibodies 3-7 days; IgG not reported | NR | NR |
| MedTeste Coronavírus (COVID-19) IgG/IgM | MEDLEVENSOHN COMÉRCIO E REPRESENTAÇÕES DE PRODUTOS HOSPITALARES LTDA; CNPJ: 05.343.029/0001-90 | Sample collection containers; centrifuge (plasma and serum only); micropipette; cronometer; lancets (for capillary blood only) | IgM antibodies 3-7 days; IgG not reported | Yes | Hangzhou Biotest Biotech Co., Ltd, Zhongtai Town, Hangzhou, China |
| FAMÍLIA KIT XGEN MASTER COVID-19 – SARS-CoV-2 | MOBIUS LIFE SCIENCE INDÚSTRIA E COMERCIO DE PRODUTOS PARA LABORATÓRIOS LTDA; CNPJ: 04.645.160/0001-49 | The instrument for real-time PCR (thermocycler); calibrated micropipettes (0.5 μL < volume < 200 μL); bench centrifuge; tube racks; PCR microplates or microtubes; Sealant film; sterile tips with filter; disposable gloves without talc; thermocycler for Real-Time PCR; vortex or similar agitator; laminar flow booth. | NR | No | Mobius Life Science Comércio de Produto para Laboratórios Ltda, Pinhais, PR, Brazil |
| DPP® COVID-19 IgM/IgG System | ORANGELIFE COMÉRCIO E INDÚSTRIA LTDA; CNPJ: 09.449.181/0001-02 | Disposable collector handles; transfer pipettes; disposable sterile lancets; adhesive dressings; DPP reader® Micro reader; cronometer or other timing devices; calibrated pipettes; disposable gloves; sterile gauze (for digital puncture whole blood samples); sachet alcohol; container for disposal of biological samples; collection tubes (for whole blood or venous serum samples) | Samples were collected 3 to 12 days after symptom onset. | No | Orangelife Comercio e Industria Ltda, Vargem Pequena, Rio de Janeiro, RJ, Brazil |
| Smart Test Covid-19 Vyttra | VYTTRA DIAGNOSTICOS IMPORTACAO E EXPORTACAO S.A.; CNPJ: 00.904.728/0012-09 | Timer; micropipettes with disposable tips; negative and positive controls | NR | Yes | NR |
| VIASURE SARS-CoV-2 | BIOMÉDICA EQUIPAMENTOS E SUPRIMENTOS HOSPITALARES LTDA - CNPJ: 01.299.509/0001-40 | Real-time PCR instrument (thermocycler); RNA extraction kit; centrifuge for 1.5ml tubes or 96-tube PCR plate (if available); vortex; micropipettes (0.5 - 20μl, 20 - 200μl); strip filter; disposable gloves | NR | Yes | CerTest Biotec S.L , Zaragoza, Spain |
| cobas SARS-CoV-2 | ROCHE DIAGNÓSTICA BRASIL LTDA - CNPJ: 30.280.358/0001-86 | Processing plate; amplification plate; pipette tips; liquid waste container; lysis reagent; mgp reagent; specimen diluent; wash reagent; solid waste bag; solid waste container or solid waste bag with insert and kit remover; waste reservoir; secondary tubes 13x75 | NR | Yes | Roche Molecular Systems, Inc, Branchburg, NJ, United States |
| Teste Rápido em Cassete 2019-nCoV IgG/IgM | QR Consulting, Importação e Distribuição de Produtos Médicos Ltda - CNPJ: 19.933.144/0001-29 | Sample collection tubes; lancets (finger bite only); centrifugal capillary tubes (plasma only); cronometer | NR | Yes | Acro Biotech Inc., Rancho Cucamonga, CA, United States |
| MAGLUMI IgG de 2019-nCoV (CLIA) | VR MEDICAL IMPORTADORA E DISTRIBUIDORA DE PRODUTOS MÉDICOS LTDA - CNPJ: 04.718.143/0001-94 | Reaction module; starter 1+2; washing concentrate; light check; Maglumi 600 reaction cup; Maglumi 800; Maglumi 1000; Maglumi 2000; Maglumi 2000 Plus; Maglumi 4000; Maglumi 4000 Plus; Maglumi Biolumi X8 8000 | IgM: most part is positive after 3 to 5 days of onset; IgG not reported | Yes | Shenzhen New Industries Biomedical Engineering Co., Ltd., Pingshan New District, Shenzhen, China |
| MAGLUMI IgM de 2019-nCoV (CLIA) | VR MEDICAL IMPORTADORA E DISTRIBUIDORA DE PRODUTOS MÉDICOS LTDA - CNPJ: 04.718.143/0001-94 | Reaction module; starter 1+2; washing concentrate; light check; Maglumi 600 reaction cup; Maglumi 800; Maglumi 1000; Maglumi 2000; Maglumi 2000 Plus; Maglumi 4000; Maglumi 4000 Plus; Maglumi Biolumi X8 8000 | IgM: most part is positive after 3 to 5 days of onset; IgG not reported | Yes | Shenzhen New Industries Biomedical Engineering Co., Ltd., Pingshan New District, Shenzhen, China |
| One Step COVID-2019 Test | CELER BIOTECNOLOGIA S/A CNPJ: 04.846.613/0001-03 | tubes to collect samples; centrifuge (serum/plasma samples only); cronometer; alcohol; cotton | NR | Yes | Guangzhou Wondfo Biotech Co., Ltd., Luogang District, Guangzhou, China |

NR, not reported
